# Supplementary material for: Usability of an Automated System for Real-Time Monitoring of Shared Decision-Making for Surgery: Mixed Methods Evaluation
Source: PubMed Central journal article supplement (PMC11043934; doi:10.2196/46698), 2024-04-10
Supplement: humanfactors_v11i1e46698_app1.pdf [file humanfactors_v11i1e46698_app1.pdf]

## Multimedia Appendix 1: Example screenshots of the measurement system

### 1. Survey invitations

| Screenshot of short messaging service invitation                                                                                                                                                                                                                                                                                                                                                                                   | Screenshot of email invitation                                                                                                                                                                                                                                                                                                                                                                                                                                                                                                                                                                                                                                                                                                                                                                                                                                                                                                                                                                                                                                                                                                                                                                                    |
|------------------------------------------------------------------------------------------------------------------------------------------------------------------------------------------------------------------------------------------------------------------------------------------------------------------------------------------------------------------------------------------------------------------------------------|-------------------------------------------------------------------------------------------------------------------------------------------------------------------------------------------------------------------------------------------------------------------------------------------------------------------------------------------------------------------------------------------------------------------------------------------------------------------------------------------------------------------------------------------------------------------------------------------------------------------------------------------------------------------------------------------------------------------------------------------------------------------------------------------------------------------------------------------------------------------------------------------------------------------------------------------------------------------------------------------------------------------------------------------------------------------------------------------------------------------------------------------------------------------------------------------------------------------|
| 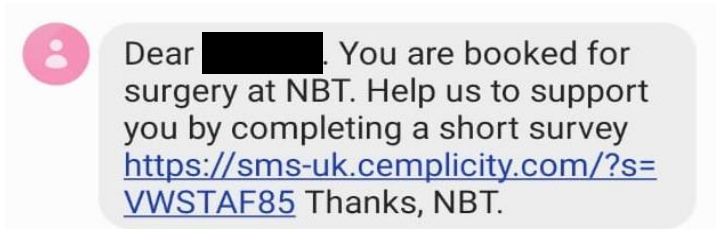 <p>A screenshot of a text message invitation. It features a pink circular profile icon on the left. The text reads: "Dear [REDACTED]. You are booked for surgery at NBT. Help us to support you by completing a short survey <a href="https://sms-uk.cemplicity.com/?s=VWSTAF85">https://sms-uk.cemplicity.com/?s=VWSTAF85</a> Thanks, NBT."</p> |  <p>A screenshot of an email invitation. At the top left is the NHS logo, followed by "North Bristol" in a large bold font and "NHS Trust" in a smaller blue font. Below this is a salutation "Dear [REDACTED]". The main body of the email contains the following text: "You've been booked for surgery at North Bristol NHS Trust. Please help us to support you by completing this short survey." followed by "The survey will take no longer than 5 minutes to complete and it will help us improve both your future care, and the care of other patients having surgery." A blue button with white text "Click here to begin" is centered. Below the button, it says "If you are interrupted, you can click on this link again and it will take you back to where you were up to." and "Thank you for your help." The email concludes with "Yours Sincerely," followed by a redacted signature and the title "Deputy Medical Director". At the bottom, it says "If you would like to read our Privacy Notice or to contact our designated Data Protection Representatives (DPR), please click <a href="#">here</a>."</p> |

2. Example screenshots of survey displayed on a smartphone

**NHS**  
North Bristol  
NHS Trust

START FINISH

**Shared Decision-making  
Questionnaire**  
**Part 1 of 2**

Thank you for participating in this questionnaire.

We would like to ask you some simple questions about how supported you were in your decision to have surgery.

The purpose of this questionnaire is to improve your care, and also the care of others in the future. Information collected will be used to measure and improve the quality of healthcare services.

If you would like to read our Privacy Policy or to contact our designated Data Protection Representatives (DPR), please click [here](#).

If you think you have received this questionnaire in error, please contact us via [consent@nbt.nhs.uk](mailto:consent@nbt.nhs.uk).

*Please select one option below*

By participating in this questionnaire you agree to the terms of North Bristol NHS Trust's Privacy Policy:

I agree and accept

I do not agree

Click here to begin

powered by **cemplicity**<sup>®</sup>

START

FINISH

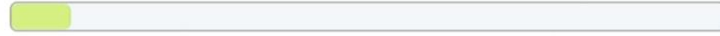

## Thinking about your planned operation...

How much effort was made to help you understand your health issues?

-- Please select from the list below --

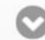

How much effort was made to listen to the things that matter most to you about your health issues?

-- Please select from the list below --

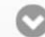

How much effort was made to include what matters most to you in choosing what to do next?

-- Please select from the list below --

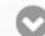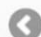

Back

Next

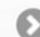

3. Example screenshots of survey displayed on an internet browser

**NHS**  
**North Bristol**  
NHS Trust

## Shared Decision-making Questionnaire

Part 1 of 2

**Thank you** for participating in this questionnaire.

We would like to ask you some simple questions about how supported you were in your decision to have surgery.

The purpose of this questionnaire is to improve your care, and also the care of others in the future. Information collected will be used to measure and improve the quality of healthcare services.

If you would like to read our Privacy Policy or to contact our designated Data Protection Representatives (DPR), please click [here](#).

If you think you have received this questionnaire in error, please contact us via [consent@nbt.nhs.uk](mailto:consent@nbt.nhs.uk).

By participating in this questionnaire you agree to the terms of North Bristol NHS Trust's Privacy Policy:

I agree and accept

I do not agree

**CLICK HERE TO BEGIN**

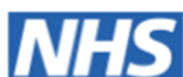

**North Bristol**

NHS Trust

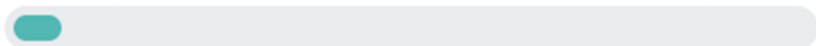

Thinking about your planned operation...

How much effort was made to help you understand your health issues?

0 1 2 3 4 5 6 7 8 9

No effort was made            Every effort was made

How much effort was made to listen to the things that matter most to you about your health issues?

0 1 2 3 4 5 6 7 8 9

No effort was made            Every effort was made

How much effort was made to include what matters most to you in choosing what to do next?

0 1 2 3 4 5 6 7 8 9

No effort was made            Every effort was made

<< BACK <

> NEXT >>
