# Supplementary material for: Usability of an Automated System for Real-Time Monitoring of Shared Decision-Making for Surgery: Mixed Methods Evaluation
Source: PubMed Central journal article supplement (PMC11043934; doi:10.2196/46698), 2024-04-10

### Multimedia Appendix 3: process map of tasks

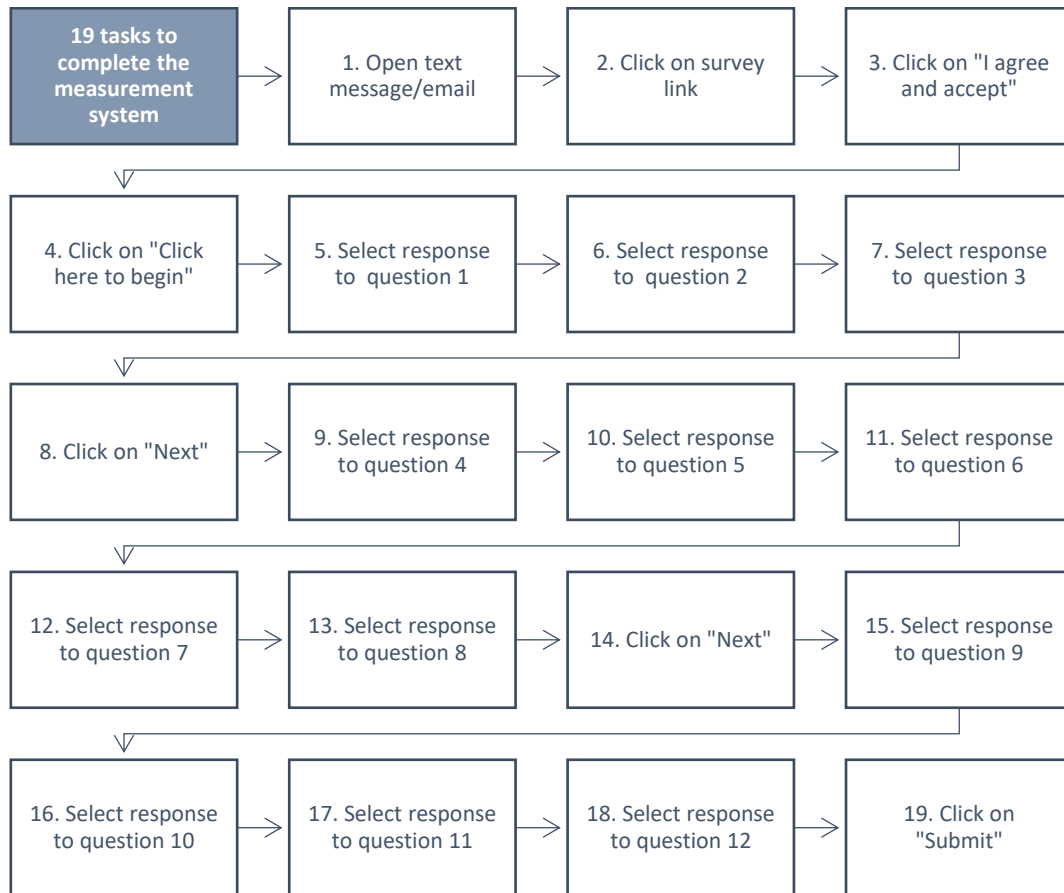

Supplement: humanfactors_v11i1e46698_app3.pdf [file humanfactors_v11i1e46698_app3.pdf]
